# Supplementary material
Source: publisher figshare collection journal article supplement (https://acs.figshare.com/ndownloader/files/4212148)
Supplement: Supplementary file 1 [file 4212148]

Supporting Information

*for*

**Simulating pH titration of a single surfactant in ionic and nonionic micelles**

Brian H. Morrow<sup>†</sup>, Yuhang Wang<sup>†</sup>, Jason A. Wallace<sup>†</sup>, Peter H. Koenig<sup>§</sup>, and Jana K. Shen<sup>†,‡,\*</sup>

<sup>†</sup>Department of Chemistry and Biochemistry, <sup>‡</sup> School of Chemical, Biological and Materials Engineering, University of Oklahoma, Norman, OK

<sup>§</sup>Computational Chemistry, Modeling & Simulation GCO, Procter and Gamble, Cincinnati, OH

\*Corresponding author. Phone: (405) 325-0458; Fax: (405) 325-6111; E-mail: jana.k.shen@ou.edu.

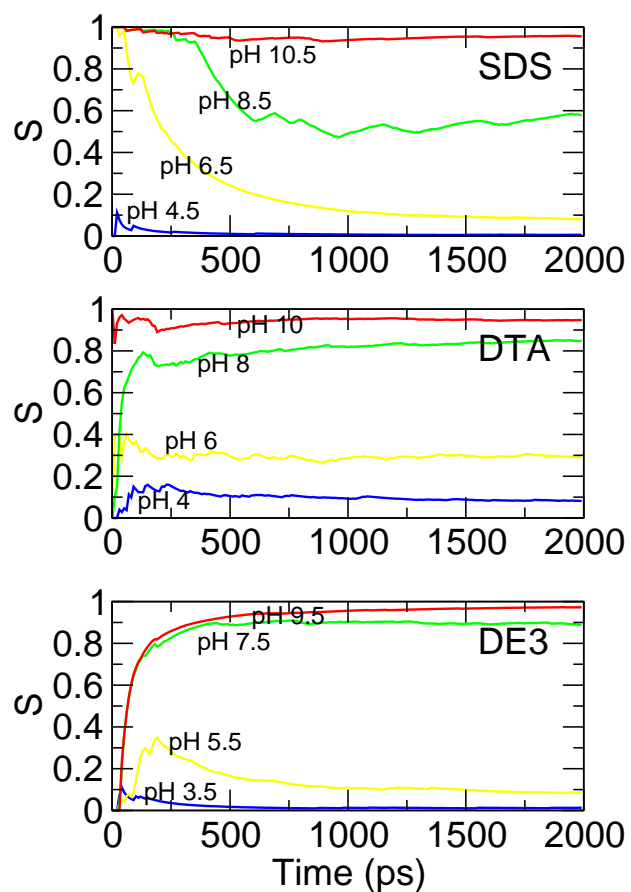

Figure S1: Cumulative unprotonated fraction of lauric acid in the SDS, DTA, and DE3 micelles from the explicit-solvent titration simulations. For each micelle  $S$  values are shown at 2 pK unit intervals as indicated.

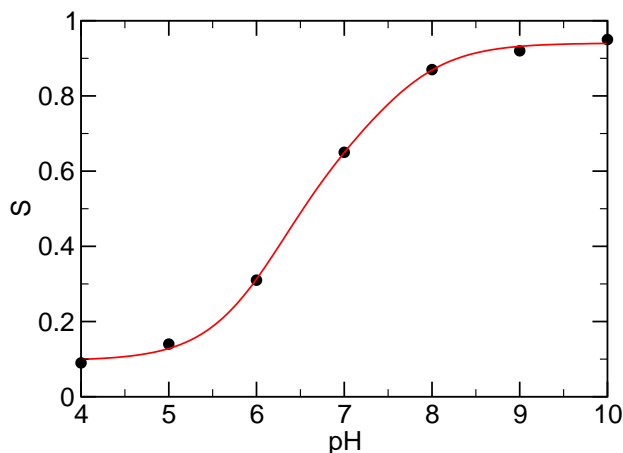

Figure S2: Titration data for lauric acid in the DTA micelle, fit to a linear combination of modified Hill equations.

The titration data for lauric acid in DTA can be fit to a linear combination of two modified Hill equations (Eqn 9 in Ref. (1)):

$$S = x \left( \frac{s_{A^-} + s_{HA} 10^{n(pK_{a,1} - pH)}}{1 + 10^{n(pK_{a,1} - pH)}} \right) + (1 - x) \left( \frac{s_{A^-} + s_{HA} 10^{n(pK_{a,2} - pH)}}{1 + 10^{n(pK_{a,2} - pH)}} \right) \quad (1)$$

where  $s_{A^-}$  and  $s_{HA}$  are fitting parameters, which represent the  $S$  values at extreme pH conditions,  $pK_{a,1}$  and  $pK_{a,2}$  represent the  $pK_a$  of lauric acid in two distinct conformational states, and  $x$  denotes the relative population of the two states. When we fit the titration data to Eqn. 1 with  $n = 1$ , we obtain the fit shown in Fig. S2, with  $pK_{a,1} = 7.4$ ,  $pK_{a,2} = 6.2$ , and  $x = 0.33$ . This indicates that the lauric acid molecule experiences two distinct conformational states due to fluctuations of the DTA micelle, with the lower- $pK_a$  state dominating, and the exchange between these states is slow relative to the simulation time. When the titration data is fit to a single Hill equation, the result is a  $pK_a$  of 6.5, with a Hill coefficient of 0.5.

## References

1. Wallace, J. A.; Shen, J. K. *J. Chem. Theory Comput.* **2011**, 7, 2617–2629.
